# Supplementary material for: EGFR Signaling Termination via Numb Trafficking in Ependymal Progenitors Controls Postnatal Neurogenic Niche Differentiation
Source: PubMed Central journal article supplement — Cell Rep. Author manuscript; Available in PMC 2019 Sep 30. (PMC6768562; doi:10.1016/j.celrep.2019.07.056), 2019-08-20
Supplement: NIHMS1538148-supplement-1.pdf [file NIHMS1538148-supplement-1.pdf]

**Cell Reports, Volume 28**

**Supplemental Information**

**EGFR Signaling Termination via Numb**

**Trafficking in Ependymal Progenitors Controls**

**Postnatal Neurogenic Niche Differentiation**

**Khadar Abdi, Gabriel Neves, Joon Pyun, Emre Kiziltug, Angelica Ahrens, and Chay T. Kuo**

## Supplemental Figures and Legends

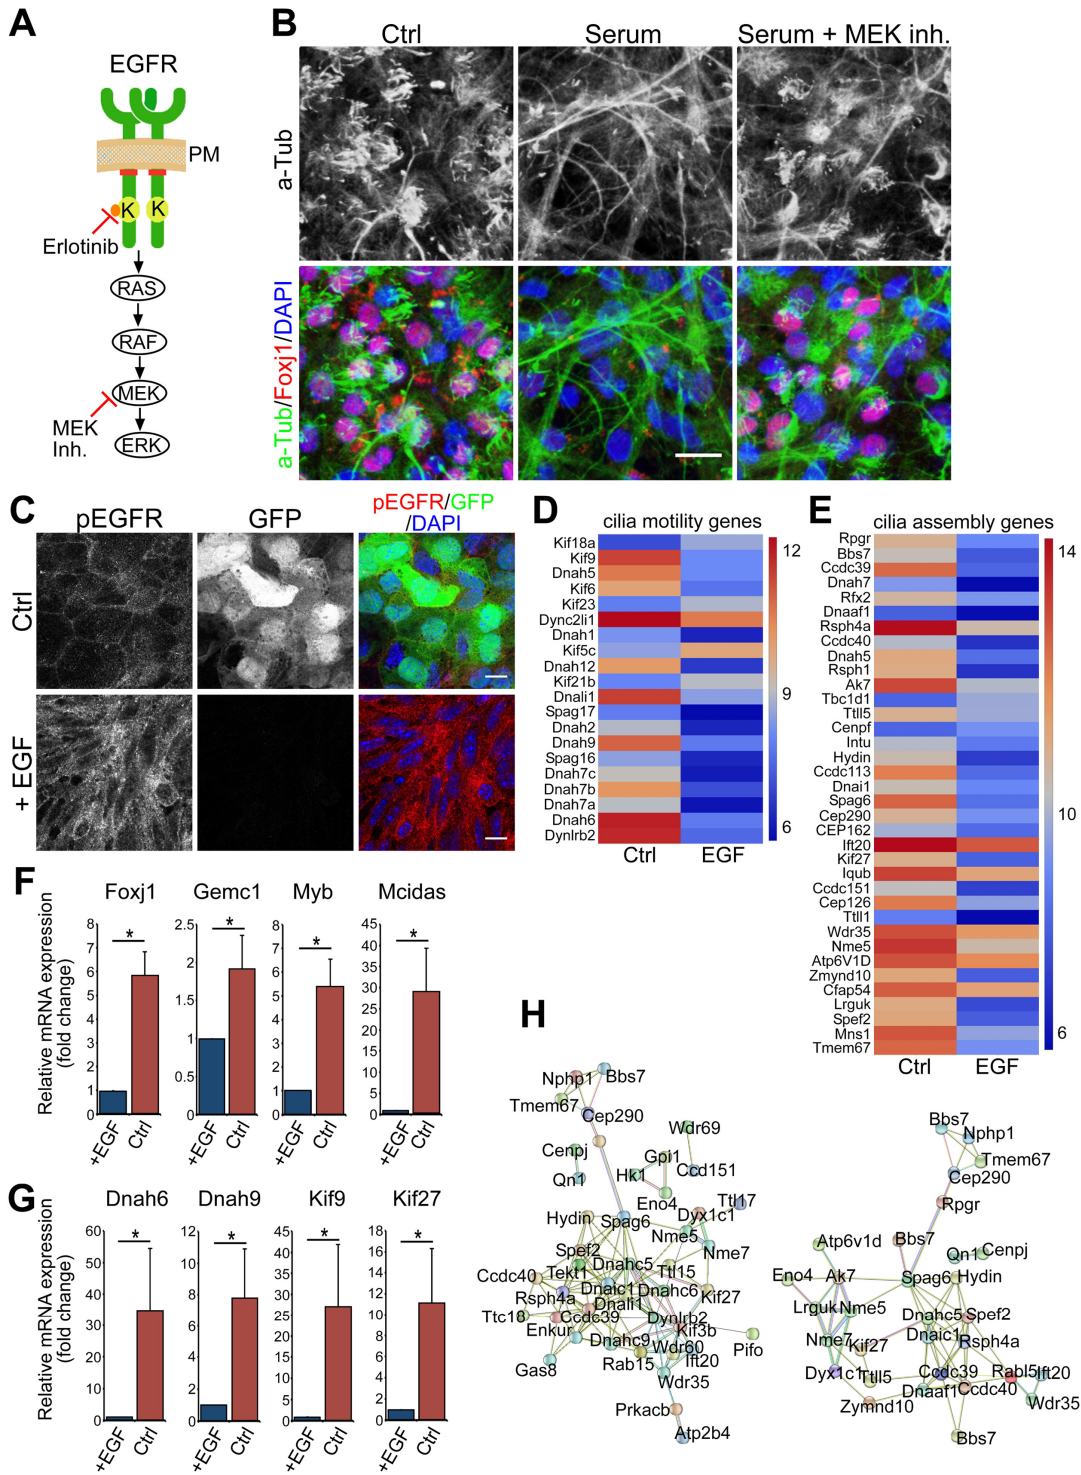

**Figure S1. EGF inhibition of molecular pathways during postnatal ependymal niche development. Related to Figure 1.** (A) Schematic showing EGFR signal transduction cascade: Erlotinib inhibits EGFR signaling at the level of receptor activation by blocking auto-phosphorylation; MEK inhibitor blocks MEK1/2 phosphorylated activation thereby inhibiting downstream signal transduction cascade. (B) Differentiating primary ECs in control (Ctrl), 10% serum (Serum), or 10% serum + MEK inhibitor (MEK inh.) culturing media, labeled with antibodies to Foxj1, acetylated-tubulin (a-Tub), and DAPI. Note the abundance of multiciliated ECs in Serum + MEK inh. but not in the Serum condition. Scale

bar: 20  $\mu\text{m}$ . **(C)** IHC images of primary ependymal cultures grown in control differentiation media (Ctrl) or with EGF addition (+ EGF), stained with anti-pEGFR, GFP antibodies, and DAPI. Scale bar: 10  $\mu\text{m}$ . **(D)** Heatmaps of genes found within the cilia motility GO term, differentially expressed between EGF-treated and untreated conditions. **(E)** Gene heatmaps within the cilia assembly GO term, differentially expressed between EGF-treated and untreated conditions. **(F, G)** Quantitative RT-PCR of mRNA expression levels of EC developmental genes *Mcidas*, *Myb*, *Foxj1*, *GEMC1* (**F**), and multiciliary component genes *DNAH6*, *DNAH9*, *KIF9*, *KIF27* (**G**), comparing EGF-treated (+EGF) and untreated (Ctrl) conditions. \*  $P < 0.05$ , Wilcoxon 2-sample test,  $n = 4$ , mean  $\pm$  SEM. **(H)** STRING analyses showing interactions/associations between differentially expressed genes identified in transcriptomic experiment, where line thickness corresponds to confidence level of gene interactions.

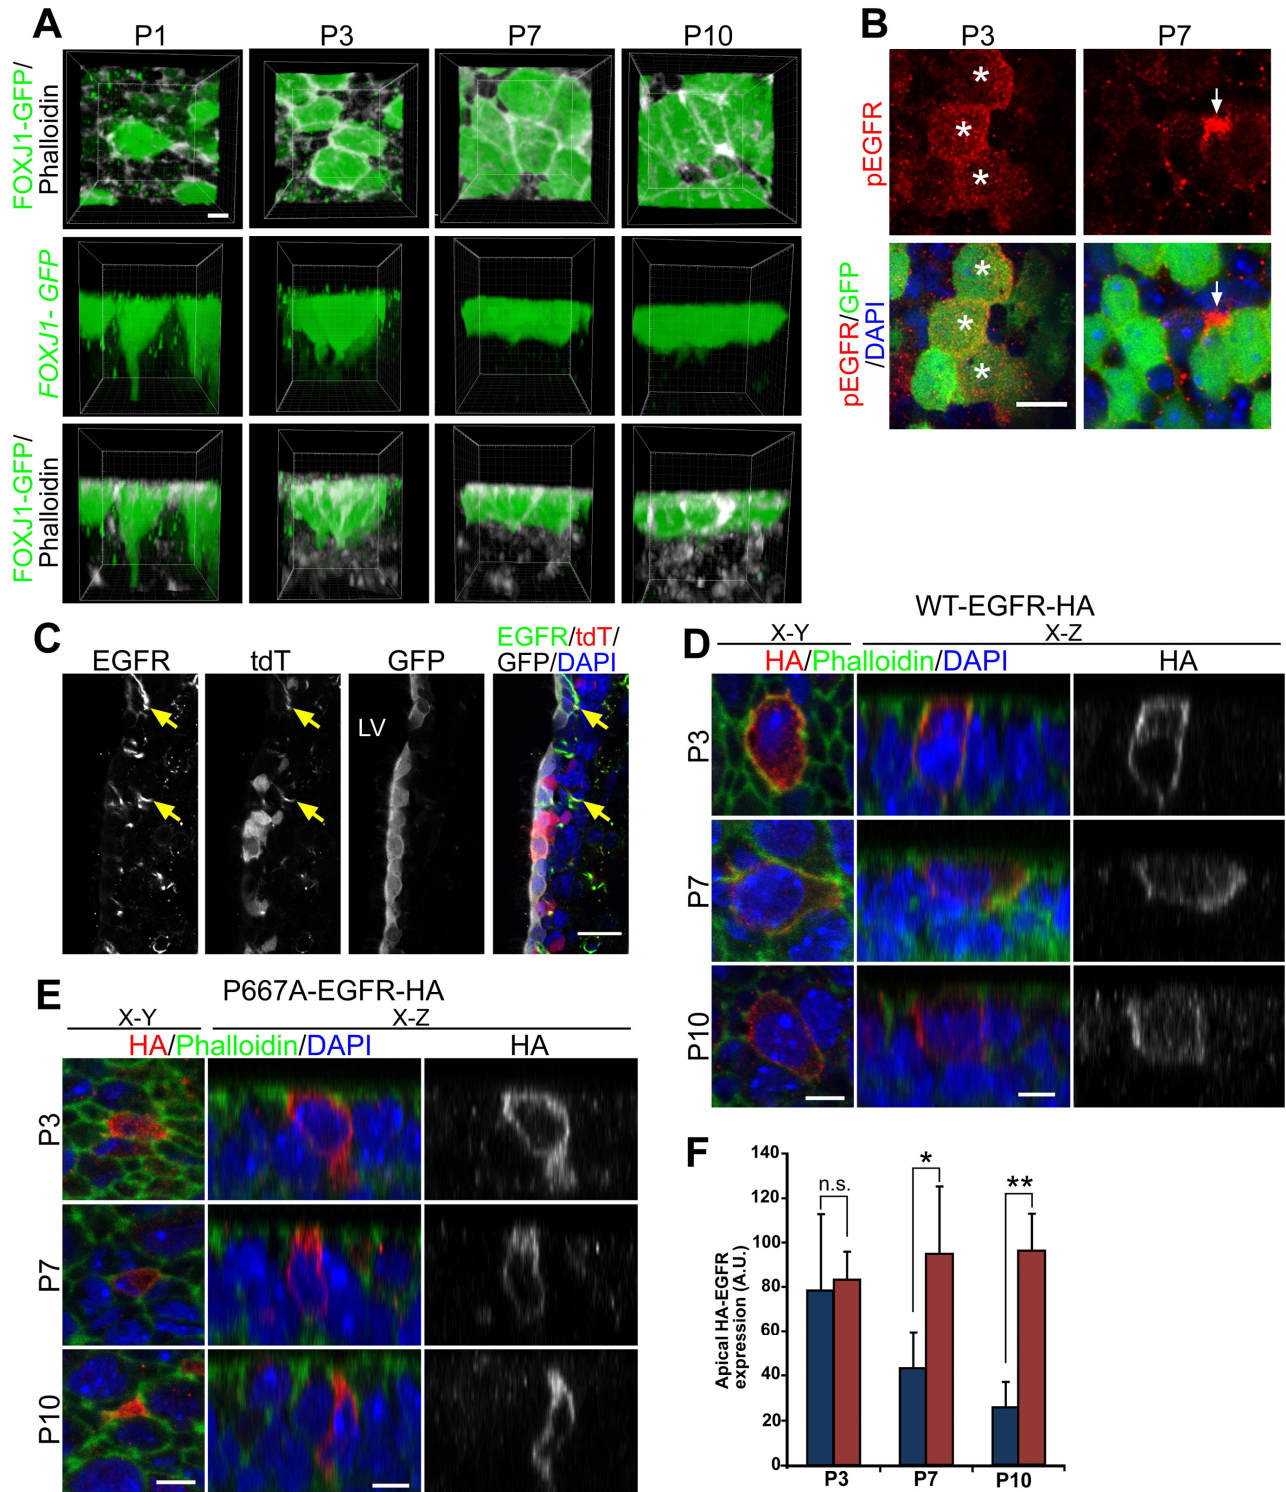

**Figure S2. EGFR in postnatal ependymal niche development. Related to Figure 2.** (A) Imaris 3D projections of lateral ventricular wholemounts from *FOXJ1-GFP*<sup>+</sup> animals of the indicated postnatal ages (X-Y, X-Z plane views), stained with phalloidin, with native GFP fluorescence signal, showing basal processes of undifferentiated GFP<sup>+</sup> pRGPs at postnatal day 1 (P1), and their apical surface area expansions during differentiation (P3 – 10). Scale bar: 10  $\mu$ m. (B) IHC images of P3, P7 ventricular wholemounts from *FOXJ1-GFP*<sup>+</sup> animals stained with pEGFR, GFP antibodies, and DAPI. Note that pEGFR is strongly expressed in GFP<sup>+</sup> ependymal cells at P3 (\*), but at P7 becomes restricted to lateral cellular domains in GFP<sup>+</sup> cells, and small ventricular surface contacts of GFP-negative cells (arrows). (C) IHC images of P3, P7 ventricular wholemounts stained with EGFR, tdT, GFP, and DAPI. Note that EGFR is strongly expressed in tdT<sup>+</sup> ependymal cells at P3 (yellow arrows), but at P7 becomes restricted to lateral cellular domains in tdT<sup>+</sup> cells. (D) IHC images of P3, P7, P10 ventricular wholemounts from WT-EGFR-HA animals stained with HA, Phalloidin, and DAPI. Note that HA-EGFR is strongly expressed in GFP<sup>+</sup> ependymal cells at P3, but at P7 becomes restricted to lateral cellular domains in GFP<sup>+</sup> cells, and small ventricular surface contacts of GFP-negative cells (arrows). (E) IHC images of P3, P7, P10 ventricular wholemounts from P667A-EGFR-HA animals stained with HA, Phalloidin, and DAPI. Note that HA-EGFR is strongly expressed in GFP<sup>+</sup> ependymal cells at P3, but at P7 becomes restricted to lateral cellular domains in GFP<sup>+</sup> cells, and small ventricular surface contacts of GFP-negative cells (arrows). (F) Bar graph showing apical HA-EGFR expression (A.U.) at P3, P7, and P10. n.s. = not significant, \* = p < 0.05, \*\* = p < 0.01.

Scale bars: 10  $\mu\text{m}$ . (C) IHC images of coronal lateral ventricular sections from 2 month old *nestin-CreER<sup>tm4</sup>; R26R-tdTomato; FOXJ1-GFP* animal, P14 tamoxifen-induced, stained with EGFR, RFP, GFP (in white for clarity) antibodies, and DAPI, showing EGFR in NSCs (arrows) but not in the ECs. Scale Bar: 20  $\mu\text{m}$ . (D, E) X-Y and X-Z view images of LV wholemounts from the indicated postnatal stages expressing WT-EGFR-HA (D) or P667A-EGFR-HA (E) and labeled with anti-HA antibody, phalloidin, and DAPI. Scale bar: 10  $\mu\text{m}$ . Note the persistent apical expression of P667A-EGFR-HA in (E). (F) Apical expression of WT-EGFR-HA and P667A-EGFR-HA at the postnatal time points indicated. \*  $P < 0.001$ , \*\*  $P < 0.0001$ , n.s. = non significant, Student's *t*-test,  $n = 10$  cells for each group, mean  $\pm$  SEM.

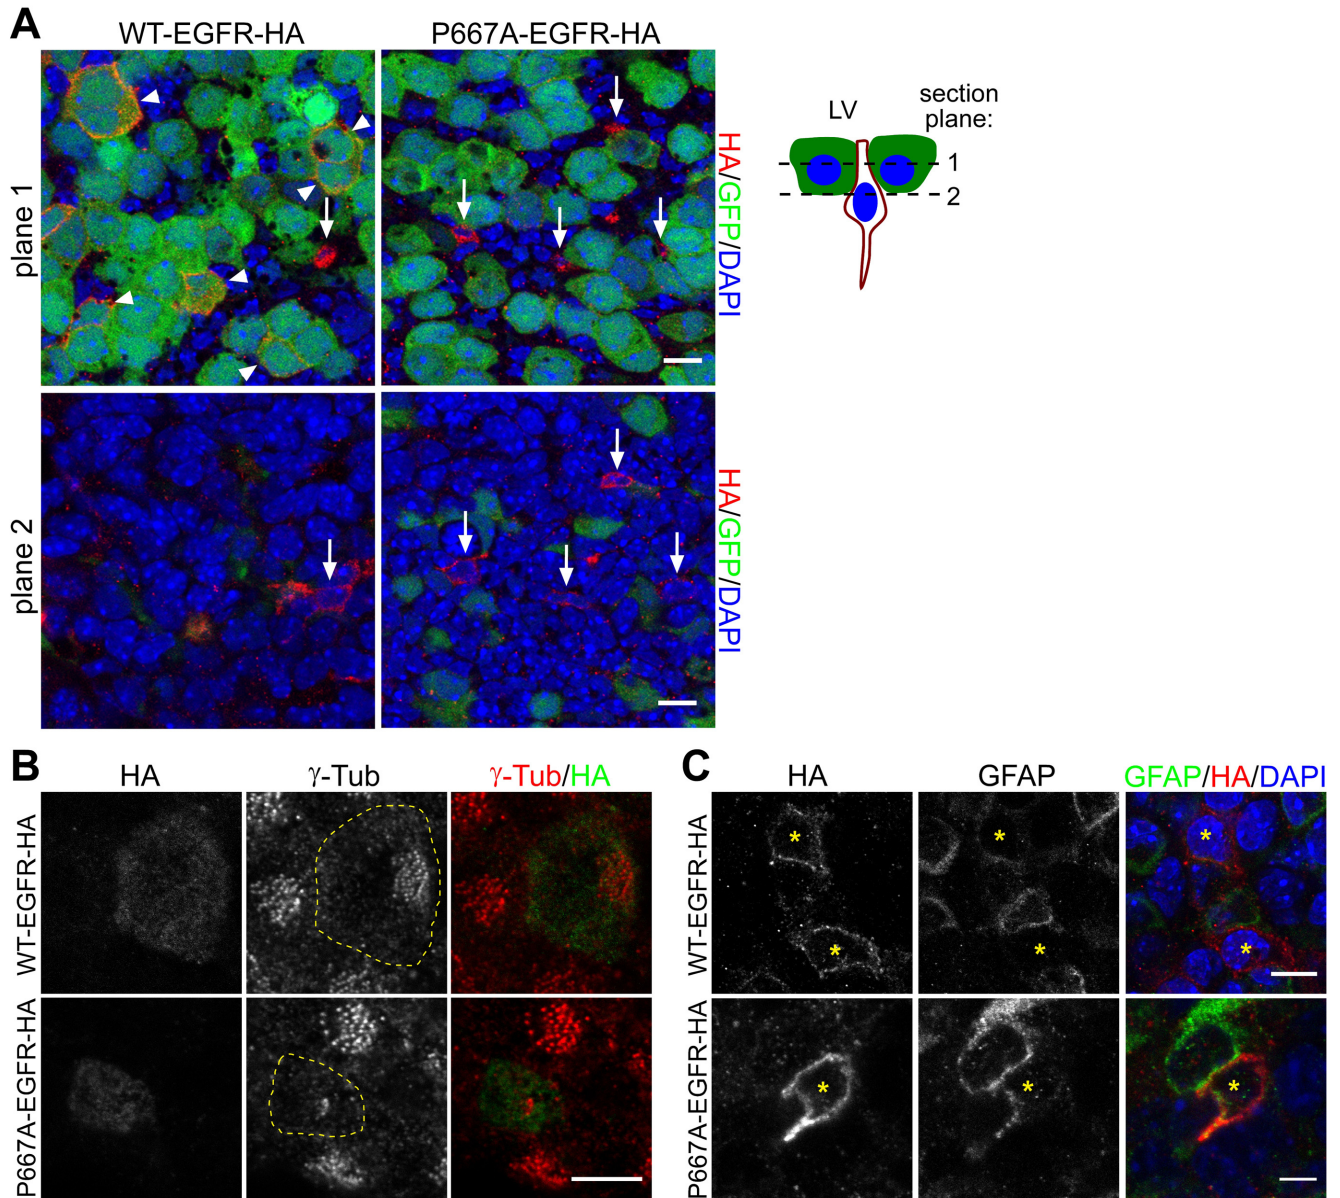

**Figure S3. Lentiviral EGFR construct expression in vivo. Related to Figure 2.** (A) Larger field views of LV wholemounts from *FOXJ1-GFP* animals, labeled with HA antibody, DAPI, and native GFP fluorescence, showing 2 sectional plane views (see schematic diagram). Note that with WT-EGFR-HA, many GFP<sup>+</sup> cells showed punctate HA<sup>+</sup> co-localization (arrowheads), while HA<sup>+</sup>/GFP<sup>-</sup> cells showed glial-like features located between ECs (arrows). With P667A-EGFR-HA mutant, HA<sup>+</sup> cells were mostly GFP<sup>-</sup>, showing small apical surface area contacts between ECs (arrows). Scale bar: 20  $\mu$ m. (B, C) IHC images of LV wholemounts with cells expressing WT-EGFR-HA or P667A-EGFR-HA (dashed lines in B, \* in C), stained with anti-HA antibody, DAPI, and either anti- $\gamma$ -tubulin ( $\gamma$ -Tub, B) or anti-GFAP (C) antibodies. Scale bars: 5  $\mu$ m (B), 10  $\mu$ m (C).

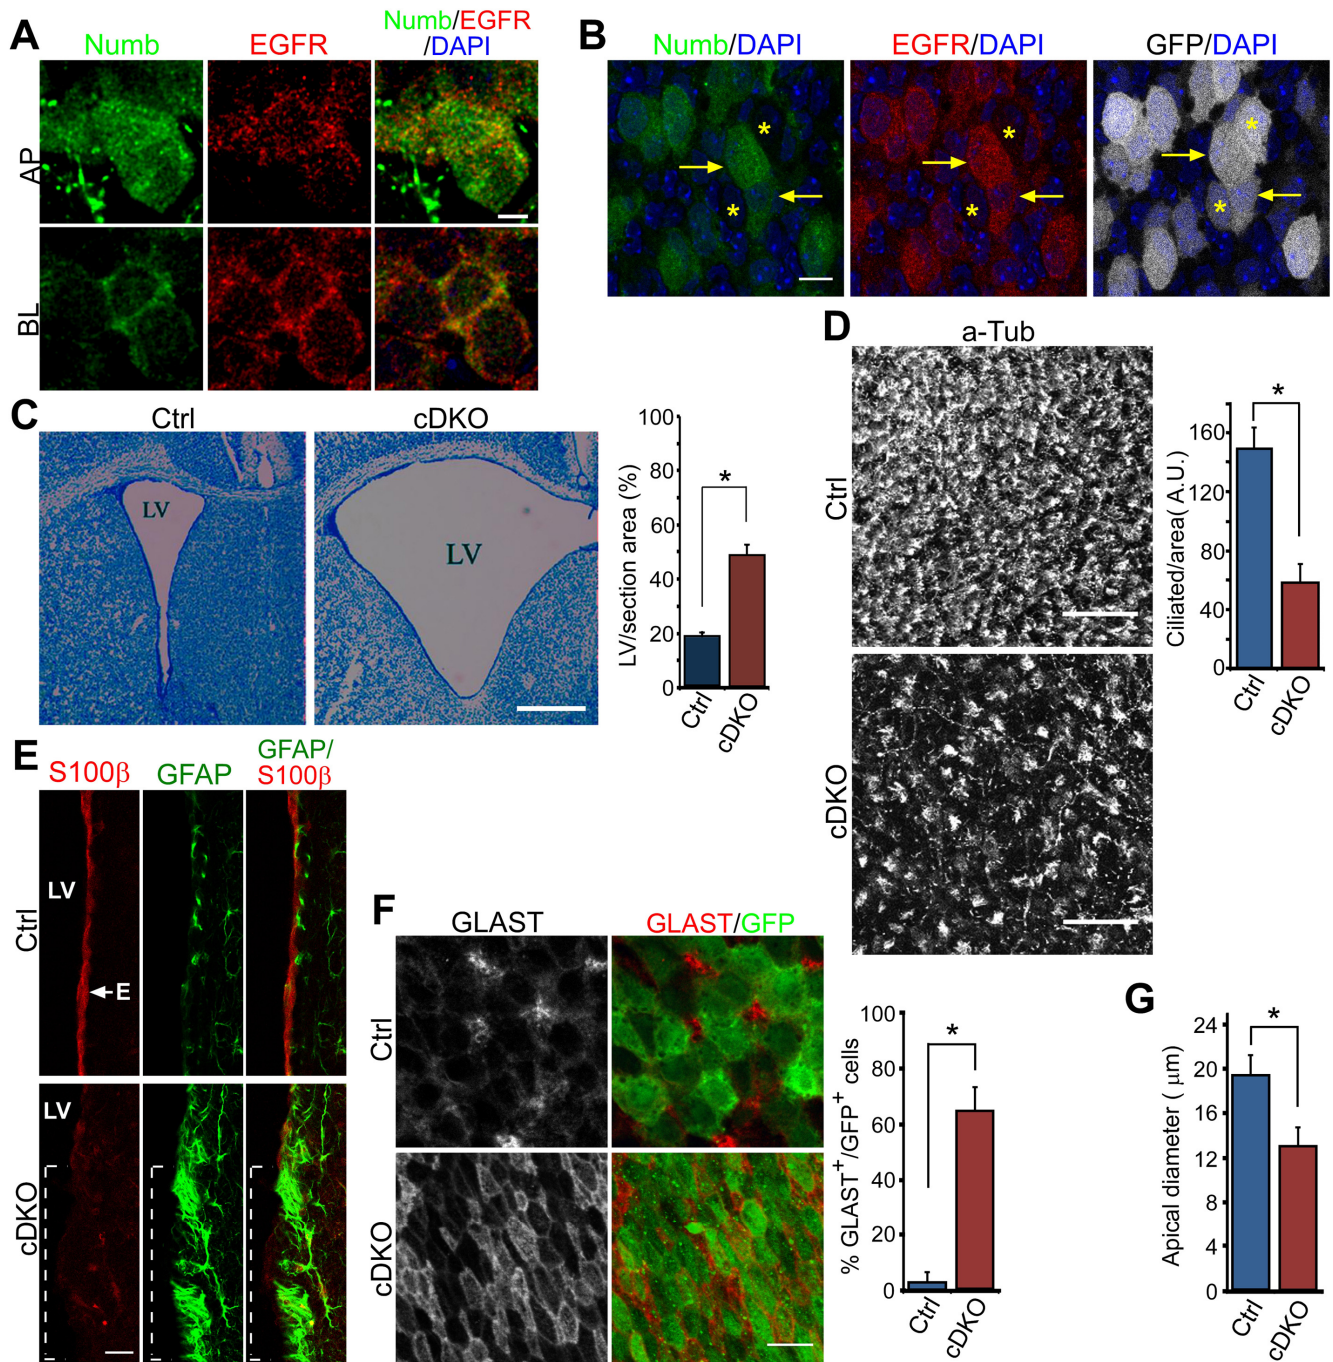

**Figure S4. Ependymal defects in Numb/Numbl-like conditional mutants. Related to Figure 3.** (A) STED super-resolution microscopy images of lateral ventricular wholemounts from P7 *FOXJ1-GFP*<sup>+</sup> animals, labeled with antibodies to Numb, EGFR, and DAPI. AP = apical domain; BL = basolateral domain. X-Z view = optical section projection from longest X-Y axis. Scale bar: 5 μm. (B) IHC images stained with anti-EGFR, Numb antibodies, and DAPI. Note *FOXJ1-GFP*<sup>+</sup> cells expressing both Numb and EGFR (arrows), and *FOXJ1-GFP*<sup>+</sup> cells negative for Numb and EGFR (\*). Scale bar: 10 μm. (C) Nissl staining of coronal brain sections from P21 control (Ctrl) and *FOXJ1-Cre; Nb<sup>flox/flox</sup>; Nbl<sup>KO/KO</sup>* (cDKO) mutant animals, showing ventricular enlargement in cDKO animals. Scale bar: 1 mm. Ventricular volume as % of total section size in Ctrl and cDKO animals. \*  $P < 0.008$ , Wilcoxon 2-sample test,  $n = 5$  for each group, mean ± SEM. (D) IHC images of LV wholemounts from P7 control or Numb cDKO animals stained for anti-a-Tub antibody. Scale bar: 60 μm. Number of ciliated cells per area in control

and Numb cDKO animals. \*  $P < 0.001$ , Student's  $t$ -test,  $n = 10$  areas for each group, mean  $\pm$  SEM. (E) IHC images of LV wholemounts from P26 control or Numb cDKO animals labeled with anti-GFAP, S100 $\beta$  antibodies. Dashed line bracket = glial scar in Numb cDKO animal, lacking S100 $\beta$ <sup>+</sup> ependymal layer seen in Ctrl (E, arrow). Scale bar: 30  $\mu$ m. (F) IHC images of LV wholemounts from P10 control and Numb cDKO animals stained with anti-GLAST, GFP antibodies. Scale bar: 20  $\mu$ m. % of cells positive for GFP and GLAST in control and Numb cDKO animals. \*  $P < 0.0001$ , Student's  $t$ -test,  $n = 10$  areas for each group, mean  $\pm$  SEM. (G) Apical diameter in GFP<sup>+</sup> cells from control and Numb cDKO animals. \*  $P < 0.0001$ , Student's  $t$ -test,  $n = 20$  cells for each group, mean  $\pm$  SEM.



## Supplemental Table

**Table S1. List of qPCR primers used in this study. Related to Key Resources Table in STAR Methods.**

| Primer Name RT-qPCR | Sequence                        |
|---------------------|---------------------------------|
| Dnah9-Fwd           | 5'-AGAGCACTATAGGCCAGCAG-3'      |
| Dnah9-Rev           | 5'-GAAGGCCTTGAGGGAGAACT-3'      |
| Dnah6-Fwd           | 5'-CGCAAGGAAGATGACACAGA-3'      |
| Dnah6-Rev           | 5'-TTAGAGACCCAGCCATGACC-3'      |
| Mcidas-Fwd          | 5'-AACCGAAGCGTCTCCTAGTG-3'      |
| Mcidas-Rev          | 5'-GGTCATCCATTGCATCTCTG-3'      |
| Myb-Fwd             | 5'-AGATGAAGACAATGTCCTCAAAGCC-3' |
| Myb-Rev             | 5'-CATGACCAGAGTTCGAGCTGAGAA-3'  |
| Foxj1-Fwd           | 5'-GGCCACCAAGATCACTCTGT-3'      |
| Foxj1-Rev           | 5'-TGTTCAAGGACAGGTTGTGG-3'      |
| GemC1-Fwd           | 5'-TGGTCTCCTGGACAACACTG-3'      |
| GemC1-Rev           | 5'-TAACTCAGAGGGGCGATTCCA-3'     |
| Kif9-Fwd            | 5'-AAGACTCCTTAGGGGGAAACTG-3'    |
| Kif9-Rev            | 5'-GTCTTTGAGATCCCCATCTTTG-3'    |
| Kif27-Fwd           | 5-GCGAGAAACGGAACGTAAAC-3        |
| Kif27-Rev           | 5-CTTTTGCTGGAGGGTCAGTC-3        |
